**In Reply:**—We thank Dr. Eikermann *et al.* for their interest in our article<sup>1</sup> and their suggestions for conducting randomized controlled studies to determine the optimal time after an upper respiratory infection (URI) for providing anesthesia and to characterize the optimal technique for airway management.

First, we would like to emphasize that the work that claims the use of a laryngeal mask airway (LMA) as an alternative to tracheal intubation in children with recent URI was completed in a randomized controlled study that included 41 children in each group.<sup>2</sup> Although the incidence of laryngospasm was 10% with the LMA (twice higher than with an endotracheal tube), this did not reach statistical significance because of the low number of children involved. To our knowledge, our study is the first to report a large number of children with a recent URI and to provide some evidence that despite the use of an LMA, the incidence of respiratory complications remains high. However, we agree with the authors that multiple attempts to insert the LMA are often associated in clinical practice with difficult anatomical conditions or light or inadequate anesthesia and are independent of the presence of an URI. However, if laryngospasm were an epiphenomenon, one would observe the higher incidence of complications at insertion, which was not the case in our study because the higher odds ratio for laryngospasm was observed intraoperatively and even in the postoperative care unit. Furthermore, multiple attempts to insert the LMA were only found in the univariate analysis for all respiratory complications, whereas URI was almost the only factor that remained in the multivariate analysis, which further confirms that a recent URI is a risk factor for the occurrence of perioperative respiratory complications with the use of an LMA.<sup>1</sup>

The second point raised by the authors on the time delay after a recent URI before proceeding with anesthesia is of interest. Although we agree that we cannot provide strong evidence that anesthesiologists should consider at least a 2-week interval, we still believe that the absence of evidence does not translate into the evidence of absence. Please note that the underlying pathophysiologic mechanisms involved in the occurrence of respiratory complications after insertion of an LMA are completely different than those observed in the case of an endotracheal tube. The nonadrenergic, noncholinergic autonomic nervous system is primarily involved with the LMA stimulating the sensory nerves (C fibers), whereas the cholinergic system is the main pathway that is activated by the insertion of an endotracheal tube. This explains in part why the incidence of bronchospasm is negligible in the pres-

ence of an LMA. Furthermore, we disagree with the authors that there was no "control group" *per se* because fever can be present independently of a URI and cough is the second most common symptom in childhood (10–20% of preschool children), not necessarily associated with a recent URI.<sup>3</sup> We based our definition of URI on the parents' statements because parental confirmation of the presence of a cold has already been identified as a predicting factor for the occurrence of adverse events during anesthesia.<sup>4</sup> Therefore, we believe that our categorization into two groups precludes the possibility of mixing URIs of different severities.

We finally agree with the authors that URI dilemma remains an issue. Please note that there is no evidence in the literature that waiting several weeks after an URI will decrease the incidence of respiratory complications. Although we agree that a randomized controlled study may definitely add some evidence to our statement, we would like to point out that prospective observational studies produce invaluable information about perioperative morbidity in pediatric anesthesia. We are aware that such studies include many confounding factors that were, however, closely examined in our study by integrating different models in the multivariate analysis. Therefore, we believe that our results are of great importance in designing for the future randomized control studies to confirm our findings without integrating these confounding factors.

**Britta S. von Ungern-Sternberg, M.D., Chris Johnson, M.D., Walid Habre, M.D., Ph.D.\*** \*Geneva Children's Hospital, Geneva, Switzerland. walid.habre@hcuge.ch

## References

1. von Ungern-Sternberg BS, Boda K, Schwab C, Sims C, Johnson C, Habre W: Laryngeal mask airway is associated with an increased incidence of adverse respiratory events in children with recent upper respiratory tract infections. *ANESTHESIOLOGY* 2007; 107:714–9
2. Tait AR, Pandit UA, Voepel-Lewis T, Munro HM, Malviya S: Use of the laryngeal mask airway in children with upper respiratory tract infections: A comparison with endotracheal intubation. *Anesth Analg* 1998; 86:706–11
3. de Jongste JC, Shields MD: Cough 2: Chronic cough in children. *Thorax* 2003; 58:998–1003
4. Parnis SJ, Barker DS, Van Der Walt JH: Clinical predictors of anaesthetic complications in children with respiratory tract infections. *Paediatr Anaesth* 2001; 11:29–40

(Accepted for publication February 22, 2008.)

## Ultrasound-guided Catheterization of the Internal Jugular Vein

**To the Editor:**—We read the article by Hosokawa *et al.*<sup>1</sup> with interest. The authors must be commended on doing this study in small children with a group of resident/fellow trainees. However, we have a few concerns.

Most people would agree with us that a randomized study associated with risks will automatically require informed consent. Although the authors argue that informed consent was not required because of the wide use of ultrasound in their practice, it is likely that if the trainee was unsuccessful after a few needle passes with the skin-marking technique (in real practice outside of the study), they would probably have resorted to using real-time guidance. Also, we are intrigued to note that when one trainee is unsuccessful after three attempts (we assume that an attempt is a single needle pass; this needs to be defined in the Materials and Methods section), he or she is replaced by another

trainee (is the other trainee going to follow the same puncture marks on the line or going to pick another mark, and if so, who guides them?). The authors do not report the range (or the mean) of the number of attempts with both techniques, and we would like to know where they produced the trainees from (especially in case of multiple attempts). We also question whether the practice of replacing one trainee with another was their standard of care or whether it was only for this study. Trainee failure and dismissal is followed by the attending in all training programs with which we are familiar. We believe that with their study design, informed consent is mandatory.

The authors bring the "old dog and new trick" concept. By their own admission, the ultrasound manipulations were done by the two experienced attending physicians and not by the trainees. How does this concept work in their case? Besides, the authors need to state clearly
